# Supplementary material for: Influence of structural features of tri-functionalized aryl phosphates on the outcome of the SRN1 process with stannyl anions: a DFT study
Source: Royal Society of Chemistry journal article supplement (doi:10.1039/c3nj40814k), 2013-01-01
Supplement: c3nj40814k.pdf [file c3nj40814k.pdf]

# Influence of structural features of tri-functionalized aryl phosphates on the outcome of the $S_{RN}1$ process with stannyl anions. A DFT study.

Viviana B. Dorn <sup>\*,a</sup>, Gustavo F. Silbestri<sup>a</sup>, María T. Lockhart<sup>a</sup>, Alicia B. Chopa <sup>\*,a</sup> and Adriana B. Pierini<sup>b</sup>

<sup>a</sup>INQUISUR, Departamento de Química, Universidad Nacional del Sur, Avenida Alem 1253, 8000 Bahía Blanca, Argentina.

<sup>b</sup>INFIQC, Departamento de Química Orgánica, Facultad de Ciencias Químicas, Universidad Nacional de Córdoba, Haya de la Torre y Medina Allende, 5000 Córdoba, Argentina.

## Table of Contents

|                                                                         |          |
|-------------------------------------------------------------------------|----------|
| <b>PES for C-OP bond fragmentation of 11<sup>•-</sup></b>               | <b>1</b> |
| Cartesians coordinates and Energy of the Radical Anion 11 <sup>•-</sup> | <b>1</b> |
| Cartesians coordinates and Energy of the corresponding TS               | <b>2</b> |
| Cartesians coordinates and Energy of the corresponding Radical          | <b>3</b> |
| <b>PES for C-OP bond fragmentation of 12<sup>•-</sup></b>               | <b>4</b> |
| Cartesians coordinates and Energy of the Radical Anion 12 <sup>•-</sup> | <b>4</b> |
| Cartesians coordinates and Energy of the corresponding TS               | <b>5</b> |
| Cartesians coordinates and Energy of the corresponding Radical          | <b>6</b> |
| Cartesians coordinates and Energy of the Radical Anion 15 <sup>•-</sup> | <b>7</b> |
| Cartesians coordinates and Energy of the Radical Anion 5 <sup>•-</sup>  | <b>8</b> |
| Cartesians coordinates and Energy of the Radical Anion 6 <sup>•-</sup>  | <b>9</b> |

\*Corresponding author: Tel./fax: #54 291 459 5187; e-mail address: [vdorn@uns.edu.ar](mailto:vdorn@uns.edu.ar) (V. Dorn).

PES for C-OP bond fragmentation of  $11'^{\cdot-}$  (B3LYP/6-31+G\* and LACVP (Sn))

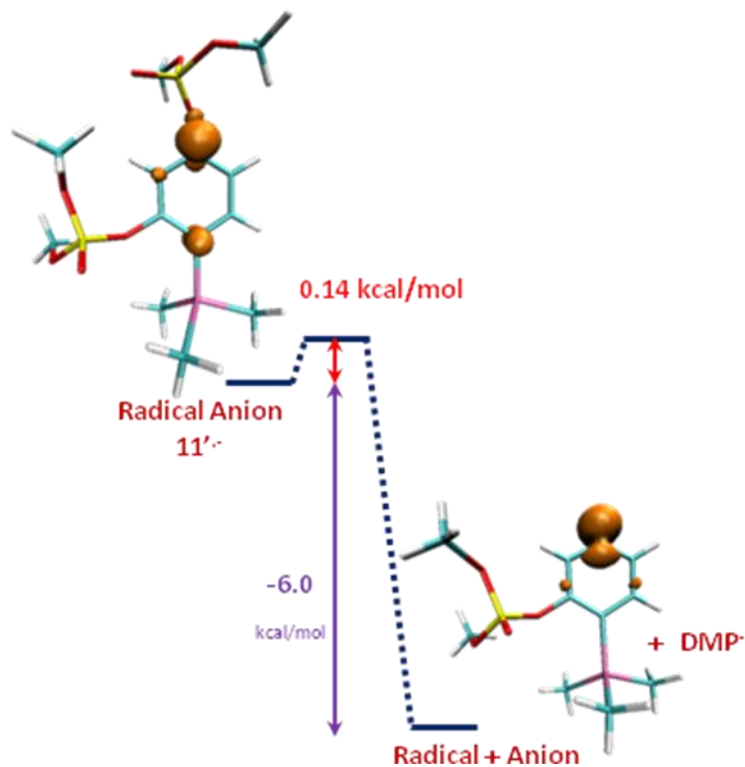

Cartesians coordinates

$11'^{\cdot-}$

48

-1 2

scf done: -1797.940729 a.u. (B3LYP/6-31+G\*/LACVP (Sn), PCM, solvent=methanol)

|    |           |           |           |
|----|-----------|-----------|-----------|
| C  | 0.120043  | -0.501964 | -0.038033 |
| C  | 0.080255  | -0.361966 | 1.336980  |
| C  | 1.258857  | -0.223164 | 2.145057  |
| C  | 2.463959  | -0.159143 | 1.397679  |
| C  | 2.555964  | -0.258046 | 0.030037  |
| C  | 1.374794  | -0.581396 | -0.723402 |
| Sn | 1.183501  | -0.043912 | 4.238702  |
| C  | 1.959144  | -1.736209 | 5.340964  |
| O  | 3.666036  | 0.072047  | 2.150097  |
| P  | 4.898387  | -0.960041 | 2.238913  |
| O  | 4.680732  | -2.245158 | 2.945947  |
| O  | 1.337229  | -0.043794 | -2.118318 |
| P  | 2.093175  | -0.883763 | -3.243371 |
| O  | 1.202374  | -2.175242 | -3.619499 |
| C  | -0.225684 | -2.088433 | -3.712873 |
| C  | 2.209780  | 1.705944  | 5.007851  |
| C  | -0.900047 | 0.159281  | 4.813062  |
| O  | 5.986138  | -0.021258 | 2.972641  |
| C  | 6.326599  | 1.269873  | 2.446128  |

|   |           |           |           |
|---|-----------|-----------|-----------|
| O | 5.506727  | -1.094414 | 0.750833  |
| C | 5.381555  | -2.303367 | -0.035542 |
| O | 1.811528  | 0.050703  | -4.550253 |
| C | 2.450044  | 1.331014  | -4.626728 |
| O | 3.519877  | -1.243187 | -3.035533 |
| H | -0.806562 | -0.606123 | -0.600609 |
| H | -0.894486 | -0.385576 | 1.825493  |
| H | -0.989808 | 0.257621  | 5.902750  |
| H | -1.355841 | 1.044912  | 4.353807  |
| H | -1.484075 | -0.717284 | 4.505964  |
| H | 1.258415  | -2.578541 | 5.285496  |
| H | 2.913375  | -2.061455 | 4.913090  |
| H | 2.110078  | -1.482831 | 6.398806  |
| H | 2.065006  | 1.801163  | 6.092225  |
| H | 3.285042  | 1.634419  | 4.808607  |
| H | 1.835526  | 2.618256  | 4.527952  |
| H | 3.511006  | -0.163084 | -0.471744 |
| H | 7.047115  | 1.701250  | 3.145638  |
| H | 6.783124  | 1.170591  | 1.455432  |
| H | 5.437678  | 1.904992  | 2.384614  |
| H | 6.364716  | -2.489514 | -0.476951 |
| H | 5.091501  | -3.142183 | 0.602049  |
| H | 4.642873  | -2.138653 | -0.823295 |
| H | -0.571743 | -3.089728 | -3.982247 |
| H | -0.656544 | -1.794371 | -2.751710 |
| H | -0.519530 | -1.373326 | -4.489457 |
| H | 2.182690  | 1.750826  | -5.600602 |
| H | 2.090057  | 1.988249  | -3.827174 |
| H | 3.538496  | 1.223934  | -4.557056 |

**TS'**

48

-1 2

scf done: -1797.931167 a.u. (B3LYP/6-31+G\*/LACVP (Sn) , PCM,  
solvent=methanol)

|    |           |           |           |
|----|-----------|-----------|-----------|
| C  | 0.000000  | 0.000000  | 0.000000  |
| C  | 0.000000  | 0.000000  | 1.379771  |
| C  | 1.244233  | 0.000000  | 2.072160  |
| C  | 2.430396  | 0.174813  | 1.307132  |
| C  | 2.372462  | 0.201709  | -0.080839 |
| C  | 1.153195  | 0.098071  | -0.806445 |
| O  | 1.223771  | 1.032563  | 3.400694  |
| P  | 0.561080  | 0.452274  | 4.704590  |
| O  | 1.609203  | -0.550020 | 5.436360  |
| C  | 3.003444  | -0.235740 | 5.470232  |
| Sn | 1.083037  | 0.089556  | -2.918756 |
| C  | 0.597337  | -1.830237 | -3.778980 |
| O  | -1.256508 | -0.068402 | -0.690536 |
| P  | -2.283260 | -1.307906 | -0.599742 |
| O  | -1.837265 | -2.608463 | -1.154950 |
| O  | 0.642278  | 1.719691  | 5.749124  |
| C  | -0.144295 | 2.877310  | 5.461409  |
| O  | -0.791260 | -0.170283 | 4.629777  |
| C  | -0.303143 | 1.538715  | -3.732218 |
| C  | 3.051820  | 0.631237  | -3.646888 |

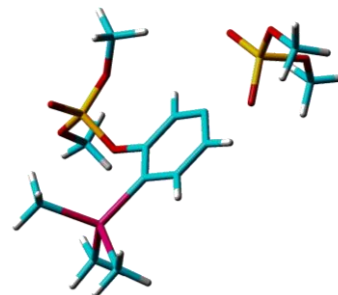

|   |           |           |           |
|---|-----------|-----------|-----------|
| O | -3.536873 | -0.679343 | -1.394210 |
| C | -4.107606 | 0.578825  | -1.000307 |
| O | -2.829433 | -1.357292 | 0.915423  |
| C | -2.458370 | -2.393993 | 1.854487  |
| H | 3.396410  | 0.236759  | 1.807322  |
| H | 3.311561  | 0.275433  | -0.632414 |
| H | 3.059468  | 0.664389  | -4.744000 |
| H | 3.354789  | 1.617541  | -3.275323 |
| H | 3.809176  | -0.095527 | -3.328245 |
| H | 1.444383  | -2.518935 | -3.672106 |
| H | -0.262285 | -2.270189 | -3.262537 |
| H | 0.362965  | -1.736711 | -4.847315 |
| H | -0.209685 | 1.602065  | -4.824094 |
| H | -1.333359 | 1.256104  | -3.489690 |
| H | -0.115396 | 2.533847  | -3.311753 |
| H | -0.928818 | -0.037212 | 1.936748  |
| H | -4.928891 | 0.768395  | -1.695777 |
| H | -4.491041 | 0.520785  | 0.023645  |
| H | -3.361805 | 1.376066  | -1.074092 |
| H | -3.388861 | -2.807580 | 2.254067  |
| H | -1.886517 | -3.178014 | 1.352653  |
| H | -1.871566 | -1.940182 | 2.656342  |
| H | 3.493692  | -1.070292 | 5.980115  |
| H | 3.403782  | -0.135394 | 4.456471  |
| H | 3.179689  | 0.691313  | 6.029110  |
| H | 0.020697  | 3.579336  | 6.284473  |
| H | 0.170731  | 3.335867  | 4.516321  |
| H | -1.209239 | 2.620442  | 5.407767  |

**Radical'**

35

0 2

scf done: -1075.650583 a.u. (B3LYP/6-31+G\*/LACVP(Sn), PCM, solvent=methanol)

|    |           |           |           |
|----|-----------|-----------|-----------|
| C  | -0.182778 | -0.151996 | 0.172316  |
| C  | -0.138756 | -0.028630 | 1.543249  |
| C  | 1.144068  | 0.061881  | 2.115963  |
| C  | 2.320659  | 0.019805  | 1.344948  |
| C  | 2.161338  | -0.114746 | -0.039606 |
| C  | 0.907296  | -0.193602 | -0.667235 |
| Sn | 4.258688  | 0.163710  | 2.307725  |
| C  | 3.858728  | 0.996727  | 4.254191  |
| O  | 3.314443  | -0.080244 | -0.849162 |
| P  | 3.926005  | -1.351589 | -1.642843 |
| O  | 2.821359  | -1.582971 | -2.799672 |
| C  | 2.714101  | -2.878614 | -3.433296 |
| C  | 5.137030  | -1.781101 | 2.516861  |
| C  | 5.547446  | 1.498286  | 1.222804  |
| O  | 4.279200  | -2.551900 | -0.855553 |
| O  | 5.189953  | -0.670089 | -2.350788 |
| C  | 5.071612  | 0.515238  | -3.164921 |
| H  | -1.032032 | 0.003084  | 2.161149  |
| H  | 1.212471  | 0.170424  | 3.197283  |
| H  | 4.799642  | 1.160477  | 4.792716  |
| H  | 3.342866  | 1.960802  | 4.179259  |
| H  | 3.242514  | 0.325794  | 4.863790  |

|   |          |           |           |
|---|----------|-----------|-----------|
| H | 4.546296 | -2.394799 | 3.206189  |
| H | 5.175270 | -2.290174 | 1.548988  |
| H | 6.154559 | -1.700969 | 2.916763  |
| H | 6.406316 | 1.783197  | 1.841597  |
| H | 5.923752 | 1.022813  | 0.311632  |
| H | 5.013524 | 2.412116  | 0.939668  |
| H | 0.832304 | -0.279380 | -1.746488 |
| H | 6.066972 | 0.695376  | -3.573740 |
| H | 4.356449 | 0.352467  | -3.977006 |
| H | 4.757422 | 1.363472  | -2.550689 |
| H | 3.572651 | -3.051518 | -4.090134 |
| H | 2.658127 | -3.666011 | -2.678257 |
| H | 1.796258 | -2.846511 | -4.022423 |

**PES for C-OP bond fragmentation of 12<sup>•-</sup> (B3LYP/6-31+G\* and LACVP (Sn))**

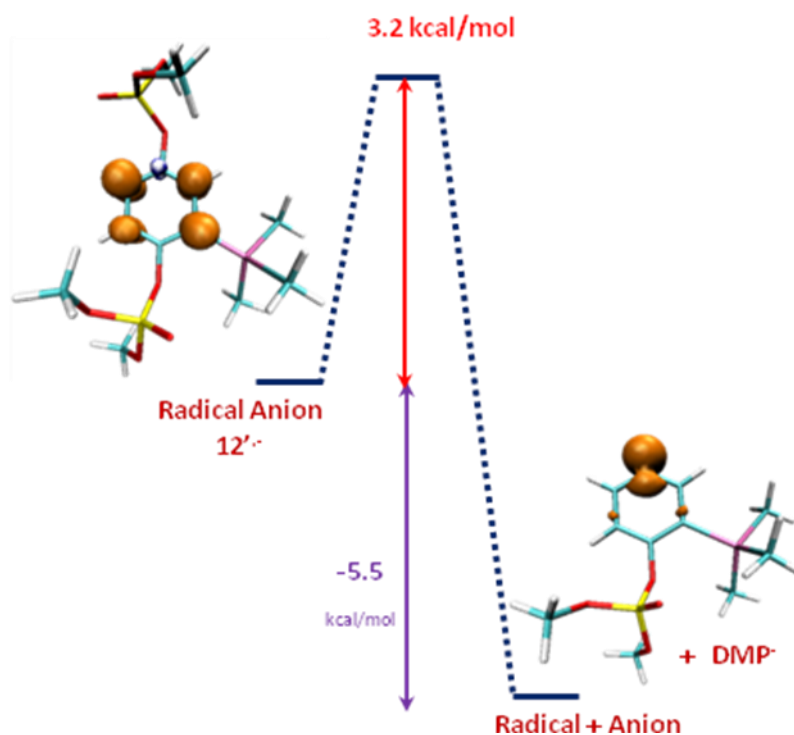

**Cartesians coordinates**

12<sup>•-</sup>

48

-1 2

scf done: -1797.939521 a.u. (B3LYP/6-31+G\*/LACVP (Sn), PCM, solvent=methanol)

|   |          |           |           |
|---|----------|-----------|-----------|
| C | 0.088623 | 0.082873  | 0.025120  |
| C | 0.086943 | -0.026324 | 1.437950  |
| C | 1.390165 | -0.114483 | 2.061492  |
| C | 2.541741 | -0.143655 | 1.295668  |
| C | 2.551726 | -0.068285 | -0.131907 |

|    |           |           |           |
|----|-----------|-----------|-----------|
| C  | 1.240719  | 0.074988  | -0.777101 |
| Sn | -1.693831 | -0.056918 | 2.542811  |
| C  | -3.419153 | 0.283603  | 1.276296  |
| Sn | 4.432030  | -0.387056 | -1.028915 |
| C  | 5.024517  | 1.050651  | -2.554239 |
| Sn | 0.867097  | 0.455011  | -2.831446 |
| C  | 5.975683  | -0.253492 | 0.490464  |
| C  | 4.783036  | -2.319966 | -1.986135 |
| C  | -2.080085 | -1.907607 | 3.629865  |
| C  | -1.749297 | 1.451909  | 4.112233  |
| H  | 1.483477  | -0.154826 | 3.148011  |
| H  | 3.492254  | -0.224240 | 1.828023  |
| H  | 6.967699  | -0.320624 | 0.024910  |
| H  | 5.918307  | 0.696618  | 1.035030  |
| H  | 5.891078  | -1.066597 | 1.221465  |
| H  | 4.687228  | -3.127155 | -1.249800 |
| H  | 4.062977  | -2.509859 | -2.790045 |
| H  | 5.794304  | -2.362684 | -2.414499 |
| H  | 6.075771  | 0.883159  | -2.825018 |
| H  | 4.426937  | 0.966783  | -3.468896 |
| H  | 4.927957  | 2.076812  | -2.180101 |
| H  | -0.889900 | 0.184572  | -0.471045 |
| H  | -2.992322 | -1.825445 | 4.236790  |
| H  | -2.201928 | -2.747423 | 2.935397  |
| H  | -1.245567 | -2.147735 | 4.300661  |
| H  | -4.341218 | 0.268818  | 1.871472  |
| H  | -3.355564 | 1.256043  | 0.773538  |
| H  | -3.503609 | -0.488979 | 0.502963  |
| H  | -2.677552 | 1.382461  | 4.695007  |
| H  | -0.905654 | 1.327707  | 4.802790  |
| H  | -1.684163 | 2.459770  | 3.685134  |
| C  | -1.253188 | 0.271479  | -3.244907 |
| C  | 1.407577  | 2.444446  | -3.530361 |
| C  | 1.813244  | -0.912550 | -4.234217 |
| H  | -1.433204 | 0.377218  | -4.322798 |
| H  | -1.637321 | -0.706191 | -2.930748 |
| H  | -1.835478 | 1.043668  | -2.728819 |
| H  | 1.341121  | -0.804049 | -5.219822 |
| H  | 2.885622  | -0.723261 | -4.354605 |
| H  | 1.686968  | -1.952056 | -3.909457 |
| H  | 1.270959  | 2.529035  | -4.616925 |
| H  | 0.772790  | 3.195941  | -3.045331 |
| H  | 2.450767  | 2.683476  | -3.296396 |

**TS'**

48

-1 2

scf done: -1797.934358 a.u. (B3LYP/6-31+G\*/LACVP (Sn) , PCM,  
solvent=methanol)

|   |          |           |           |
|---|----------|-----------|-----------|
| C | 0.000000 | 0.000000  | 0.000000  |
| C | 0.000000 | 0.000000  | 1.427437  |
| C | 1.184161 | 0.000000  | 2.179537  |
| C | 2.397266 | -0.042399 | 1.467168  |
| C | 2.437876 | -0.050638 | 0.061890  |
| C | 1.257538 | -0.056922 | -0.668682 |

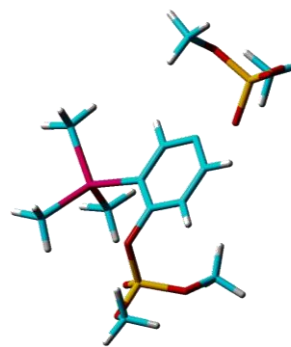

|    |           |           |           |
|----|-----------|-----------|-----------|
| Sn | 1.017322  | 0.148716  | 4.315612  |
| C  | 0.747393  | -1.769837 | 5.259507  |
| O  | 3.657295  | 0.007137  | 2.160982  |
| P  | 4.396613  | -1.344093 | 2.623250  |
| O  | 3.887040  | -2.002101 | 3.852177  |
| O  | -1.074324 | -1.110631 | -0.605841 |
| P  | -2.216350 | -0.503131 | -1.506576 |
| O  | -3.294058 | -1.719875 | -1.618746 |
| C  | -3.715160 | -2.421578 | -0.445916 |
| C  | 2.642781  | 1.203189  | 5.261757  |
| C  | -0.780614 | 1.285425  | 4.726972  |
| O  | 5.917729  | -0.841919 | 2.772438  |
| C  | 6.582239  | -0.146574 | 1.705635  |
| O  | 4.477899  | -2.303621 | 1.324866  |
| C  | 3.471302  | -3.311593 | 1.084645  |
| O  | -3.066227 | 0.546853  | -0.573957 |
| C  | -2.796055 | 1.950267  | -0.672472 |
| O  | -1.894973 | 0.055492  | -2.849222 |
| H  | 1.289771  | -0.056590 | -1.756630 |
| H  | -0.962831 | 0.048974  | 1.936025  |
| H  | -1.669905 | 0.787843  | 4.322602  |
| H  | -0.921274 | 1.401562  | 5.809761  |
| H  | -0.725727 | 2.285020  | 4.280007  |
| H  | 0.523847  | -1.650489 | 6.327387  |
| H  | -0.082314 | -2.315219 | 4.793992  |
| H  | 1.662226  | -2.359856 | 5.150858  |
| H  | 3.535923  | 0.571888  | 5.293186  |
| H  | 2.885466  | 2.117893  | 4.708924  |
| H  | 2.373354  | 1.481650  | 6.288671  |
| H  | 3.403272  | -0.037364 | -0.442813 |
| H  | 7.569226  | 0.122189  | 2.089770  |
| H  | 6.688190  | -0.799210 | 0.832677  |
| H  | 6.027176  | 0.755749  | 1.432883  |
| H  | 3.238574  | -3.840968 | 2.012908  |
| H  | 2.571311  | -2.847997 | 0.672654  |
| H  | 3.906728  | -4.000183 | 0.356581  |
| H  | -2.853387 | -2.832158 | 0.091086  |
| H  | -4.280044 | -1.757299 | 0.219249  |
| H  | -4.363531 | -3.233761 | -0.788695 |
| H  | -3.561877 | 2.452049  | -0.072371 |
| H  | -1.800380 | 2.175820  | -0.275768 |
| H  | -2.859892 | 2.281943  | -1.714477 |

**Radical'**

35

0 2

scf done: -1075.650675 a.u. (B3LYP/6-31+G\*/LACVP(Sn),PCM, solvent=methanol)

|   |           |           |           |
|---|-----------|-----------|-----------|
| C | 0.154425  | 0.026184  | -0.144836 |
| C | 0.176737  | -0.059955 | 1.252725  |
| C | 1.346973  | -0.175234 | 2.007903  |
| C | 2.581687  | -0.230940 | 1.342761  |
| C | 2.545752  | -0.154173 | -0.033184 |
| C | 1.407962  | -0.023995 | -0.801460 |
| O | -1.050715 | 0.066532  | 1.941221  |
| P | -1.816560 | -1.148643 | 2.683873  |

|    |           |           |           |
|----|-----------|-----------|-----------|
| O  | -0.843229 | -1.436891 | 3.942351  |
| C  | -0.885247 | -2.726673 | 4.594017  |
| Sn | -1.666624 | 0.243261  | -1.312095 |
| C  | -1.007927 | 0.989626  | -3.221831 |
| C  | -2.624992 | -1.659204 | -1.554581 |
| C  | -2.976582 | 1.681765  | -0.400169 |
| O  | -2.176698 | -2.336224 | 1.879997  |
| O  | -3.093273 | -0.375755 | 3.265135  |
| C  | -2.972331 | 0.812540  | 4.074200  |
| H  | 3.509507  | -0.323570 | 1.900863  |
| H  | 1.467409  | 0.044275  | -1.885232 |
| H  | -1.872533 | 1.199499  | -3.862551 |
| H  | -0.438169 | 1.919229  | -3.111304 |
| H  | -0.377257 | 0.262462  | -3.746064 |
| H  | -3.596077 | -1.539022 | -2.048833 |
| H  | -2.007290 | -2.322619 | -2.170119 |
| H  | -2.778186 | -2.133784 | -0.580695 |
| H  | -2.424767 | 2.581658  | -0.107254 |
| H  | -3.763987 | 1.977812  | -1.103086 |
| H  | -3.451826 | 1.262969  | 0.492150  |
| H  | 1.290096  | -0.220542 | 3.090928  |
| H  | -3.988435 | 1.071283  | 4.375781  |
| H  | -2.358408 | 0.613504  | 4.957960  |
| H  | -2.535168 | 1.624907  | 3.487252  |
| H  | -1.815466 | -2.835763 | 5.160847  |
| H  | -0.803512 | -3.527476 | 3.855501  |
| H  | -0.032235 | -2.744708 | 5.274319  |

### Cartesians coordinates

15<sup>-</sup>

48

-1 2

scf done: -1797.865219 a.u. (B3LYP/6-31+G\*/LACVP (Sn))

|   |          |           |           |
|---|----------|-----------|-----------|
| C | 0.169138 | 0.131466  | -0.151126 |
| C | 0.049531 | -0.087684 | 1.272275  |
| C | 1.294063 | -0.254392 | 1.982434  |
| C | 2.497850 | -0.174328 | 1.330680  |
| C | 2.640034 | 0.065017  | -0.069813 |
| C | 1.402927 | 0.204037  | -0.751168 |
| H | 1.306629 | -0.474742 | 3.048396  |
| O | 3.681398 | -0.300499 | 2.111111  |
| P | 4.744581 | -1.505701 | 1.991452  |
| O | 4.263195 | -2.899476 | 2.144265  |
| O | 1.401478 | 0.426679  | -2.164691 |
| P | 2.344857 | -0.340435 | -3.218112 |
| O | 2.025787 | -1.912605 | -3.142532 |
| C | 0.682849 | -2.405199 | -2.962910 |
| O | 5.774245 | -1.063353 | 3.154637  |
| C | 6.328681 | 0.258613  | 3.193140  |
| O | 5.626783 | -1.229096 | 0.664201  |
| C | 5.496810 | -2.043634 | -0.522132 |
| O | 1.589603 | 0.075020  | -4.598139 |



|    |           |           |           |
|----|-----------|-----------|-----------|
| C  | 1.663208  | 1.436384  | -5.041104 |
| O  | 3.800119  | -0.051673 | -3.206631 |
| H  | -0.713817 | 0.216762  | -0.783750 |
| Sn | -1.784464 | 0.067297  | 2.272708  |
| H  | 3.574346  | 0.405163  | -0.500832 |
| H  | 6.981129  | 0.288951  | 4.069838  |
| H  | 6.913747  | 0.456208  | 2.288251  |
| H  | 5.533602  | 1.004169  | 3.291498  |
| H  | 6.470041  | -2.008340 | -1.018819 |
| H  | 5.246594  | -3.072332 | -0.248882 |
| H  | 4.728602  | -1.624292 | -1.175154 |
| H  | 0.759019  | -3.494159 | -3.000476 |
| H  | 0.290929  | -2.091274 | -1.992135 |
| H  | 0.034745  | -2.049092 | -3.770672 |
| H  | 1.188202  | 1.466156  | -6.025196 |
| H  | 1.123516  | 2.093011  | -4.349528 |
| H  | 2.707119  | 1.758212  | -5.122636 |
| C  | -3.387188 | -0.769597 | 1.066650  |
| C  | -1.727083 | -1.004426 | 4.155094  |
| C  | -2.529271 | 2.060630  | 2.795564  |
| H  | -4.352032 | -0.675736 | 1.581955  |
| H  | -3.470508 | -0.251157 | 0.103076  |
| H  | -3.209025 | -1.831806 | 0.860951  |
| H  | -2.728168 | -1.050045 | 4.603074  |
| H  | -1.368230 | -2.029846 | 4.010363  |
| H  | -1.060196 | -0.512638 | 4.873691  |
| H  | -3.517729 | 1.997296  | 3.273850  |
| H  | -1.843506 | 2.561564  | 3.489957  |
| H  | -2.620599 | 2.690541  | 1.901994  |

### Cartesians coordinates

5<sup>-</sup>

48

-1 2

scf done: -599.792721 a.u. (B3LYP/6-31+G\*/LACVP (Sn) )

|    |           |           |           |
|----|-----------|-----------|-----------|
| C  | 0.088623  | 0.082873  | 0.025120  |
| C  | 0.086943  | -0.026324 | 1.437950  |
| C  | 1.390165  | -0.114483 | 2.061492  |
| C  | 2.541741  | -0.143655 | 1.295668  |
| C  | 2.551726  | -0.068285 | -0.131907 |
| C  | 1.240719  | 0.074988  | -0.777101 |
| Sn | -1.693831 | -0.056918 | 2.542811  |
| C  | -3.419153 | 0.283603  | 1.276296  |
| Sn | 4.432030  | -0.387056 | -1.028915 |
| C  | 5.024517  | 1.050651  | -2.554239 |
| Sn | 0.867097  | 0.455011  | -2.831446 |
| C  | 5.975683  | -0.253492 | 0.490464  |
| C  | 4.783036  | -2.319966 | -1.986135 |
| C  | -2.080085 | -1.907607 | 3.629865  |
| C  | -1.749297 | 1.451909  | 4.112233  |
| H  | 1.483477  | -0.154826 | 3.148011  |

|   |           |           |           |
|---|-----------|-----------|-----------|
| H | 3.492254  | -0.224240 | 1.828023  |
| H | 6.967699  | -0.320624 | 0.024910  |
| H | 5.918307  | 0.696618  | 1.035030  |
| H | 5.891078  | -1.066597 | 1.221465  |
| H | 4.687228  | -3.127155 | -1.249800 |
| H | 4.062977  | -2.509859 | -2.790045 |
| H | 5.794304  | -2.362684 | -2.414499 |
| H | 6.075771  | 0.883159  | -2.825018 |
| H | 4.426937  | 0.966783  | -3.468896 |
| H | 4.927957  | 2.076812  | -2.180101 |
| H | -0.880099 | 0.184572  | -0.471045 |
| H | -2.992322 | -1.825445 | 4.236790  |
| H | -2.201928 | -2.747423 | 2.935397  |
| H | -1.245567 | -2.147735 | 4.300661  |
| H | -4.341218 | 0.268818  | 1.871472  |
| H | -3.355564 | 1.256043  | 0.773538  |
| H | -3.503609 | -0.488979 | 0.502963  |
| H | -2.677552 | 1.382461  | 4.695007  |
| H | -0.905654 | 1.327707  | 4.802790  |
| H | -1.684163 | 2.459770  | 3.685134  |
| C | -1.253188 | 0.271479  | -3.244907 |
| C | 1.407577  | 2.444446  | -3.530361 |
| C | 1.813244  | -0.912550 | -4.234217 |
| H | -1.433204 | 0.377218  | -4.322798 |

### Cartesians coordinates

6<sup>-</sup>

48

-1 2

scf done: -599.795110 a.u. (B3LYP/6-31+G\*/LACVP (Sn))

|    |           |           |           |
|----|-----------|-----------|-----------|
| C  | -0.123332 | 0.186489  | 0.200483  |
| C  | -0.098189 | 0.042116  | 1.610468  |
| C  | 1.091696  | -0.021051 | 2.344266  |
| C  | 2.327024  | 0.085829  | 1.637018  |
| C  | 2.348752  | 0.125141  | 0.221902  |
| C  | 1.136516  | 0.163478  | -0.473469 |
| Sn | 1.064980  | -0.271275 | 4.462290  |
| C  | 1.677862  | 1.569894  | 5.430256  |
| H  | 1.152907  | 0.182921  | -1.566183 |
| Sn | -1.948169 | 0.398285  | -0.862215 |
| C  | -2.437192 | -1.455206 | -1.884235 |
| C  | -0.919642 | -0.712014 | 5.206804  |
| C  | 2.470774  | -1.779299 | 5.138729  |
| C  | -3.610277 | 0.772290  | 0.476405  |
| C  | -1.881665 | 1.890885  | -2.439708 |
| H  | 3.267026  | 0.097200  | 2.193117  |
| Sn | 4.209866  | 0.097219  | -0.834346 |
| H  | -1.048831 | -0.021845 | 2.147116  |
| H  | 2.440927  | -1.875911 | 6.232451  |
| H  | 2.239938  | -2.757141 | 4.700246  |
| H  | 3.495238  | -1.511740 | 4.847851  |
| H  | -0.912444 | -0.776152 | 6.303786  |
| H  | -1.632227 | 0.071094  | 4.916941  |
| H  | -1.288067 | -1.664977 | 4.811122  |
| H  | 1.788082  | 1.434140  | 6.513719  |

|   |           |           |           |
|---|-----------|-----------|-----------|
| H | 2.639039  | 1.913074  | 5.028229  |
| H | 0.940326  | 2.363201  | 5.256885  |
| H | -4.557077 | 0.784583  | -0.080579 |
| H | -3.677433 | -0.011145 | 1.243223  |
| H | -3.503003 | 1.734951  | 0.988632  |
| H | -3.336169 | -1.346188 | -2.504241 |
| H | -1.610778 | -1.768420 | -2.534231 |
| H | -2.615712 | -2.259174 | -1.159514 |
| H | -2.850894 | 1.950424  | -2.954294 |
| H | -1.643538 | 2.882041  | -2.037124 |
| H | -1.115493 | 1.634798  | -3.184027 |
| C | 3.903709  | 0.158051  | -2.975479 |
| C | 5.404987  | 1.826964  | -0.315467 |
| C | 5.397230  | -1.643052 | -0.324646 |
| H | 4.863280  | 0.082574  | -3.504415 |
| H | 3.265416  | -0.669229 | -3.306800 |
| H | 3.422651  | 1.097192  | -3.276976 |
| H | 6.350304  | -1.641921 | -0.869870 |
| H | 5.618236  | -1.659591 | 0.750236  |
| H | 4.859737  | -2.566098 | -0.572276 |
| H | 6.414502  | 1.754453  | -0.740709 |
| H | 4.939485  | 2.746678  | -0.690441 |
| H | 5.496403  | 1.918867  | 0.773741  |
